# Supplementary material
Source: HighWire-hosted journal article supplement (http://bmjopenquality.bmj.com/highwire/filestream/136260/field_highwire_adjunct_files/0/ds6481.pdf)

**Fig 1: Cause of delays in patients being seen**

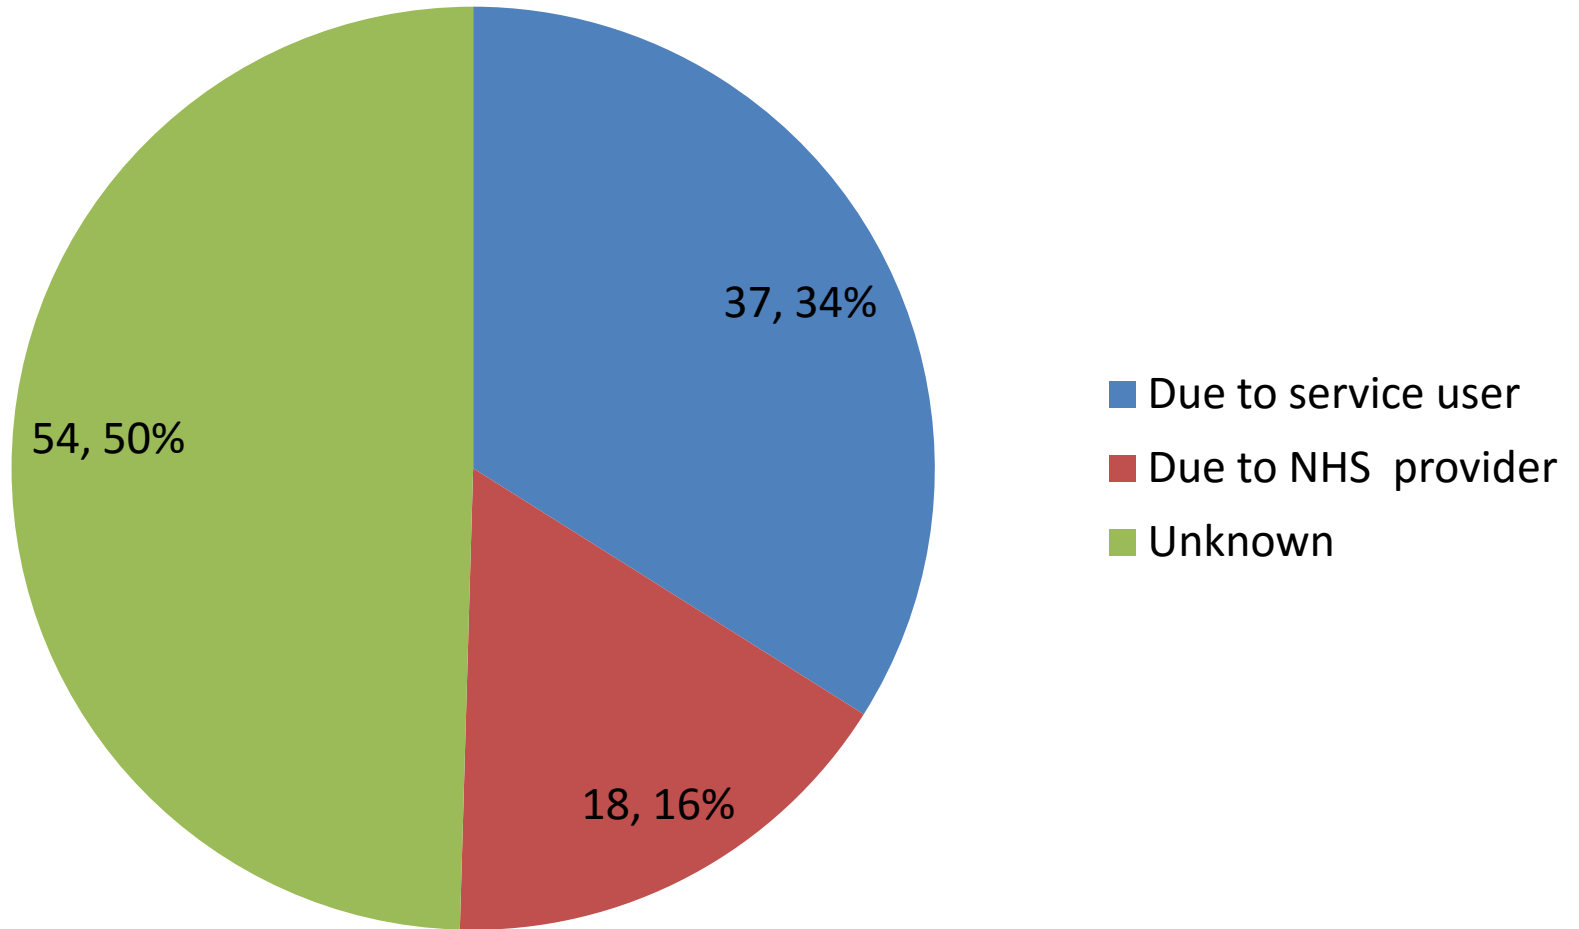

**Fig 2: Percentage of cases reviewed within set standards**

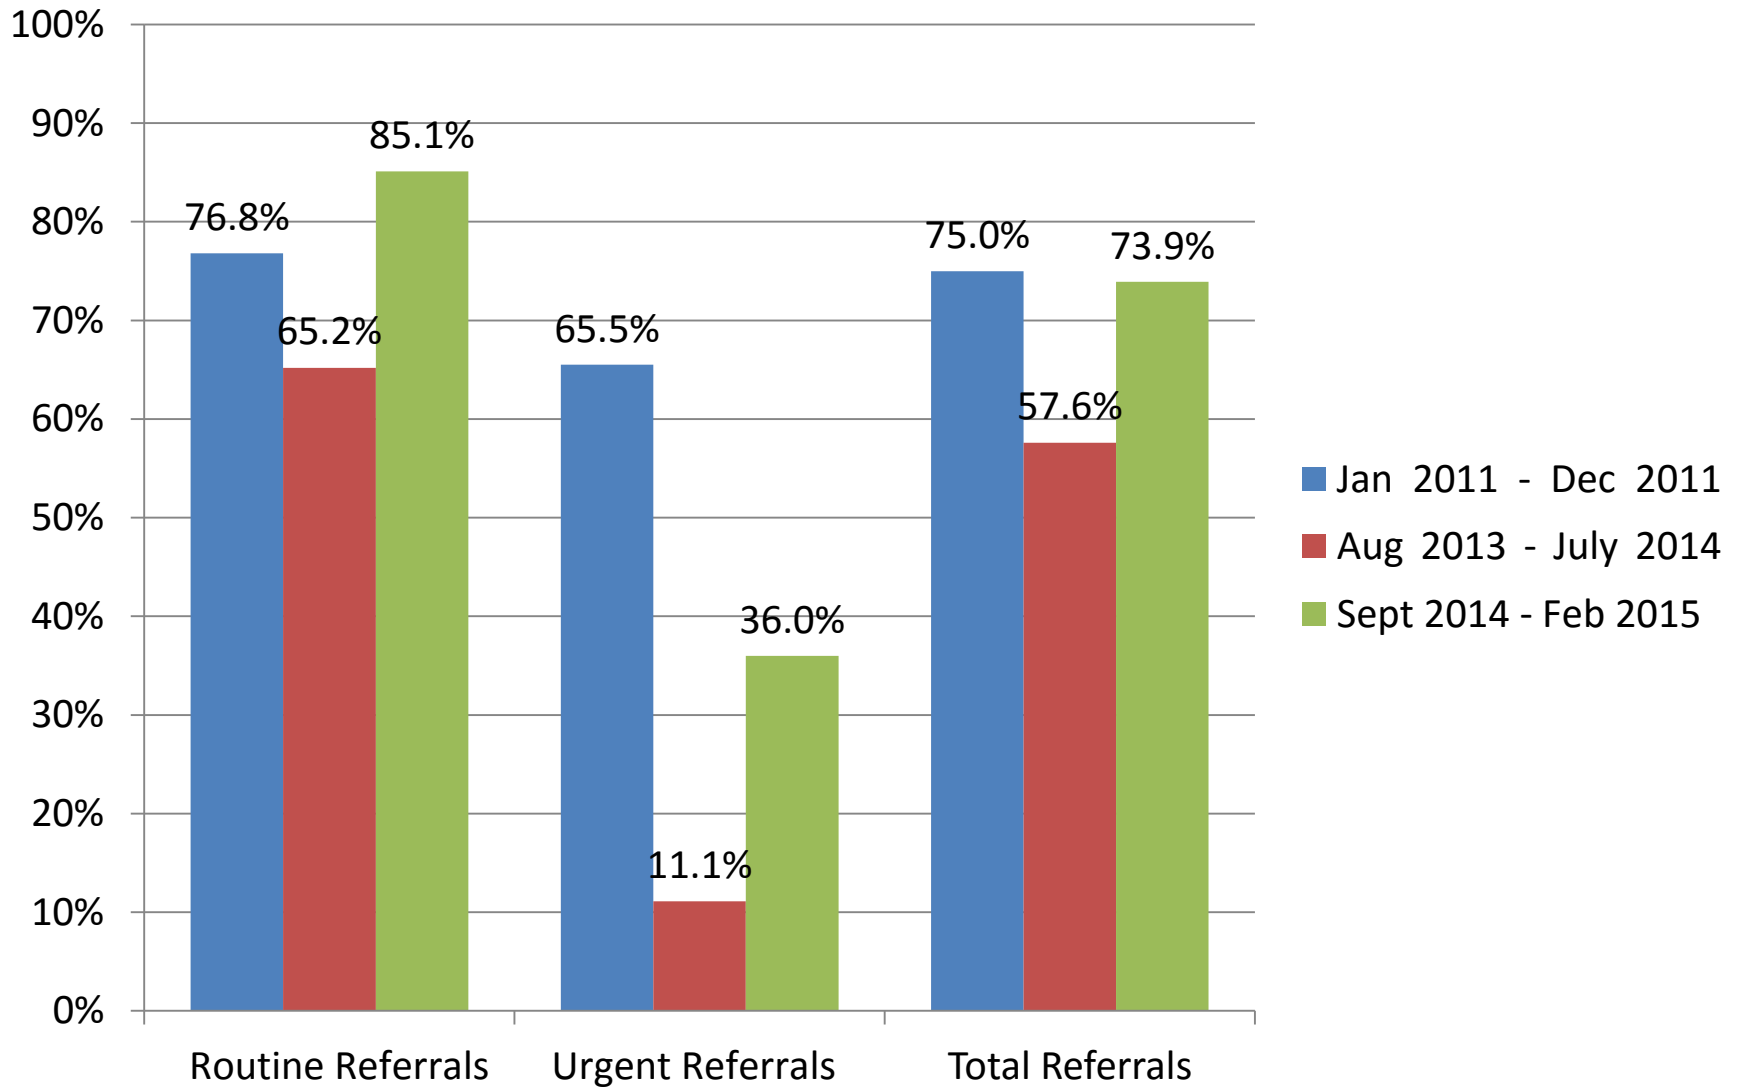

**Fig 3: Average waiting time from receipt of referral to assessment**

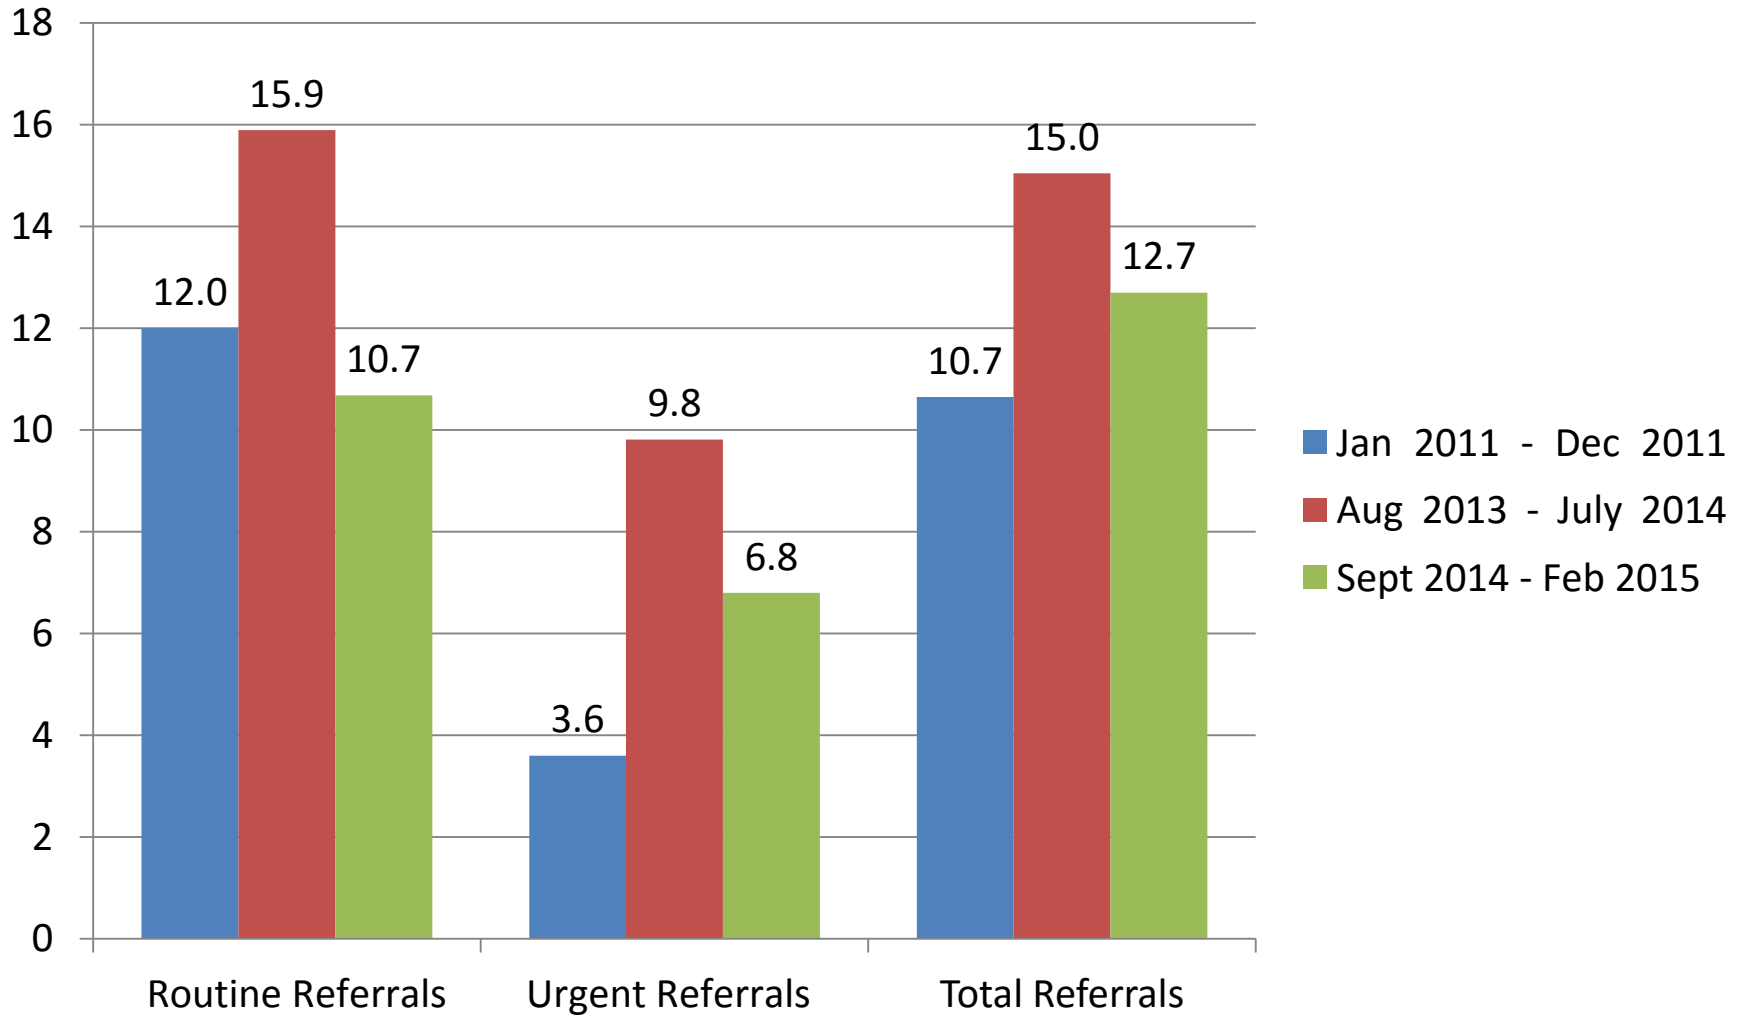

Supplement: ds6481.pdf [file ds6481.pdf]
